# Supplementary material for: Trends in Phenolic Profiles of Achillea millefolium from Different Geographical Gradients
Source: MDPI journal article supplement (doi:10.3390/plants12040746), 2023-02-07
Supplement: s1 [file s1]

# Supplementary Materials

**Table S1.** Pearson correlation coefficients (r) and significance value (p) between the content of individual phenolic compounds in inflorescences, leaves and stems of *Achillea millefolium* and the latitude and longitude of population sites in Turkey and Lithuania

| Compounds                   | Latitude       |         |        |         |       |         | Longitude      |         |        |         |       |         |
|-----------------------------|----------------|---------|--------|---------|-------|---------|----------------|---------|--------|---------|-------|---------|
|                             | Inflorescences |         | Leaves |         | Stems |         | Inflorescences |         | Leaves |         | Stems |         |
|                             | r              | p       | r      | p       | r     | p       | r              | p       | r      | p       | r     | p       |
| Neochlorogenic acid         | 0.80           | < 0.001 | 0.63   | < 0.001 | -0.09 | 0.593   | -0.76          | < 0.001 | -0.57  | < 0.001 | 0.11  | 0.512   |
| Chlorogenic acid            | 0.87           | < 0.001 | 0.82   | < 0.001 | 0.83  | < 0.001 | -0.84          | < 0.001 | -0.79  | < 0.001 | -0.83 | < 0.001 |
| 4-O-caffeoylquinic acid     | -0.33          | 0.051   | -0.70  | < 0.001 | 0.25  | 0.140   | 0.33           | 0.052   | 0.68   | < 0.001 | -0.27 | 0.107   |
| 3,4-O-dicaffeoylquinic acid | 0.47           | 0.004   | 0.77   | < 0.001 | 0.69  | < 0.001 | -0.45          | 0.005   | -0.76  | < 0.001 | -0.74 | < 0.001 |
| 3,5-O-dicaffeoylquinic acid | 0.90           | < 0.001 | 0.78   | < 0.001 | 0.66  | < 0.001 | -0.88          | < 0.001 | -0.74  | < 0.001 | -0.67 | < 0.001 |
| 1,5-O-dicaffeoylquinic acid | 0.86           | < 0.001 | 0.79   | < 0.001 | 0.76  | < 0.001 | -0.84          | < 0.001 | -0.77  | < 0.001 | -0.76 | < 0.001 |
| 4,5-O-dicaffeoylquinic acid | 0.83           | < 0.001 | 0.81   | < 0.001 | 0.68  | < 0.001 | -0.82          | < 0.001 | -0.81  | < 0.001 | -0.68 | < 0.001 |
| Caffeic acid                | 0.64           | < 0.001 | 0.43   | 0.008   | 0.46  | 0.005   | -0.60          | < 0.001 | -0.39  | 0.017   | -0.46 | 0.005   |
| Quercitrin                  | 0.42           | 0.010   | 0.73   | < 0.001 | 0.74  | < 0.001 | -0.38          | 0.022   | -0.71  | < 0.001 | -0.71 | < 0.001 |
| Rutin                       | -0.07          | 0.681   | 0.27   | 0.108   | 0.23  | 0.187   | 0.09           | 0.582   | -0.26  | 0.122   | -0.24 | 0.161   |
| Quercetin                   | -0.20          | 0.241   | -0.50  | 0.002   | -0.52 | 0.001   | 0.16           | 0.351   | 0.45   | 0.006   | 0.50  | 0.002   |
| Isoquercitrin               | -0.61          | 0.000   | 0.13   | 0.456   | 0.32  | 0.057   | 0.63           | < 0.001 | -0.16  | 0.351   | -0.35 | 0.038   |
| Luteolin                    | -0.48          | 0.003   | -0.21  | 0.208   | 0.28  | 0.092   | 0.46           | 0.005   | 0.23   | 0.180   | -0.28 | 0.098   |
| Luteolin-7-O-glucoside      | 0.51           | 0.002   | 0.51   | 0.001   | 0.28  | 0.102   | -0.45          | 0.006   | -0.50  | 0.002   | -0.32 | 0.061   |
| Luteolin-7-O-rutinoside     | -0.04          | 0.797   | 0.79   | < 0.001 | -0.09 | 0.585   | 0.09           | 0.612   | -0.76  | < 0.001 | 0.06  | 0.717   |
| Luteolin-O-3,7-diglucoside  | -0.69          | < 0.001 | -0.20  | 0.239   | –     | –       | 0.71           | < 0.001 | 0.22   | 0.205   | –     | –       |
| Apigenin                    | 0.79           | < 0.001 | -0.14  | 0.407   | –     | –       | -0.80          | < 0.001 | 0.14   | 0.404   | –     | –       |
| Apigenin-7-O-glucoside      | 0.93           | < 0.001 | 0.70   | < 0.001 | 0.77  | < 0.001 | -0.92          | < 0.001 | -0.68  | < 0.001 | -0.80 | < 0.001 |
| Santin                      | -0.69          | < 0.001 | -0.17  | 0.313   | -0.41 | 0.013   | 0.71           | < 0.001 | 0.12   | 0.484   | 0.41  | 0.014   |
| Total                       | 0.81           | < 0.001 | 0.83   | < 0.001 | 0.80  | < 0.001 | -0.78          | < 0.001 | -0.80  | < 0.001 | -0.81 | < 0.001 |

**Table S2.** The mean quantities (µg/g, DM) of phenolic compounds in inflorescences, leaves and stems of *Achillea millefolium* populations from Nevşehir (1) and Gaziantep (2) provinces in Turkey and comparison of their differences ( $p \leq 0.05$ ) according to *t*-test.

| Compounds                           | Inflorescences |         |                |          | Leaves  |         |       |          | Stems  |        |       |          |
|-------------------------------------|----------------|---------|----------------|----------|---------|---------|-------|----------|--------|--------|-------|----------|
|                                     | M (1)          | M (2)   | t <sup>1</sup> | <i>p</i> | M (1)   | M (2)   | t     | <i>p</i> | M (1)  | M (2)  | t     | <i>p</i> |
| Neochlorogenic acid                 | 208.0          | 229.2   | -1.12          | 0.283    | 486.0   | 612.9   | -0.88 | 0.391    | 252.1  | 275.4  | -0.65 | 0.528    |
| Chlorogenic acid                    | 1045.3         | 1753.8  | -2.12          | 0.052    | 4372.8  | 3959.5  | 0.24  | 0.813    | 1281.8 | 902.7  | 1.25  | 0.230    |
| 4- <i>O</i> -caffeoylquinic acid    | 1419.5         | 1318.6  | 0.38           | 0.708    | 1678.6  | 1426.3  | 0.72  | 0.485    | 617.4  | 660.2  | -0.35 | 0.734    |
| 3,4- <i>O</i> -dicafeoylquinic acid | 1648.9         | 1741.5  | -0.18          | 0.861    | 1232.2  | 789.1   | 1.01  | 0.329    | 260.5  | 126.0  | 2.76  | 0.015    |
| 3,5- <i>O</i> -dicafeoylquinic acid | 1716.2         | 2948.6  | -2.70          | 0.017    | 2912.1  | 4401.3  | -1.42 | 0.179    | 875.2  | 662.2  | 1.38  | 0.188    |
| 1,5- <i>O</i> -dicafeoylquinic acid | 0.0            | 0.0     | –              | –        | 45.5    | 56.7    | -0.94 | 0.363    | 58.9   | 68.7   | -0.75 | 0.463    |
| 4,5- <i>O</i> -dicafeoylquinic acid | 327.9          | 311.0   | 0.26           | 0.800    | 113.3   | 165.8   | -1.12 | 0.281    | 139.7  | 78.0   | 2.19  | 0.046    |
| Caffeic acid                        | 3.7            | 0.0     | 1.15           | 0.271    | 24.9    | 43.0    | -1.57 | 0.139    | 20.1   | 10.1   | 1.12  | 0.283    |
| Quercitrin                          | 0.0            | 0.0     | –              | –        | 0.0     | 0.0     | –     | –        | 0.0    | 0.0    | –     | –        |
| Rutin                               | 148.7          | 219.4   | -1.18          | 0.257    | 2196.1  | 1810.2  | 0.56  | 0.586    | 547.2  | 728.9  | -0.98 | 0.346    |
| Quercetin                           | 45.7           | 25.2    | 1.65           | 0.121    | 35.9    | 25.5    | 1.52  | 0.151    | 33.1   | 29.0   | 0.90  | 0.381    |
| Isoquercitrin                       | 243.1          | 566.5   | -1.55          | 0.143    | 101.2   | 19.5    | 1.24  | 0.235    | 0.0    | 0.0    | –     | –        |
| Luteolin                            | 3920.7         | 1750.0  | 2.38           | 0.032    | 194.5   | 551.3   | -0.76 | 0.459    | 127.6  | 114.6  | 0.70  | 0.497    |
| Luteolin-7- <i>O</i> -glucoside     | 1200.6         | 2223.7  | -2.46          | 0.028    | 178.8   | 327.2   | -0.59 | 0.562    | 77.5   | 26.2   | 2.21  | 0.044    |
| Luteolin-7- <i>O</i> -rutinoside    | 404.2          | 754.8   | -1.83          | 0.089    | 147.2   | 170.2   | -0.34 | 0.742    | 240.4  | 194.3  | 0.72  | 0.483    |
| Luteolin- <i>O</i> -3,7-diglucoside | 1317.2         | 2240.2  | -1.24          | 0.237    | 0.0     | 186.0   | -0.88 | 0.396    | 0.0    | 0.0    | –     | –        |
| Apigenin                            | 224.6          | 61.6    | 1.93           | 0.075    | 14.7    | 22.7    | -0.28 | 0.785    | 0.0    | 0.0    | –     | –        |
| Apigenin-7- <i>O</i> -glucoside     | 208.2          | 268.0   | -0.54          | 0.600    | 0.0     | 40.8    | -0.88 | 0.396    | 2.5    | 0.0    | 1.15  | 0.271    |
| Santin                              | 376.5          | 600.3   | -2.14          | 0.051    | 444.1   | 203.4   | 2.31  | 0.036    | 231.9  | 232.8  | -0.12 | 0.906    |
| Total                               | 14459.1        | 17012.5 | -1.18          | 0.258    | 14177.6 | 14811.3 | -0.17 | 0.865    | 4765.8 | 4109.2 | 0.96  | 0.355    |

<sup>1</sup> df = 14
